# Supplementary material for: Interplay between non-covalent interactions in 1D supramolecular polymers based on 1,4-bis(iodoethynyl)benzene
Source: Royal Society of Chemistry journal article supplement (doi:10.1039/d0cp05917j), 2021-01-01
Supplement: d0cp05917j1.pdf [file d0cp05917j1.pdf]

# Supplementary Information

## Interplay between non-covalent interactions in 1D supramolecular polymers based 1,4-bis(iodoethynyl)benzene

Lucia González,<sup>a</sup> Sara Graus,<sup>b</sup> Blanca Gaspar,<sup>b</sup> Sheila Espasa,<sup>b</sup> Adrián Velázquez-Campoy,<sup>c</sup> Julen Munarriz,<sup>d</sup> José Luis Serrano,<sup>a</sup> Rosa M. Tejedor,<sup>e</sup> Santiago Uriel,<sup>\*a</sup>

<sup>a</sup> Dr. L. González, Prof. J. L. Serrano and Dr. S. Uriel

Departamento de Química Orgánica

Instituto de Nanociencia de Aragón (INA)-Instituto de Ciencia de Materiales de Aragón (ICMA)

Universidad de Zaragoza-CSIC, Zaragoza (Spain)

E-mail: suriel@unizar.es

<sup>b</sup> Dr. S. Graus, B. Gaspar, S. Espasa

Departamento de Química Orgánica

Universidad de Zaragoza, Zaragoza (Spain)

<sup>c</sup> Dr. A. Velázquez-Campoy

Department of Biochemistry and Molecular & Cellular Biology

Institute for Biocomputation and Physics of Complex Systems (BIFI), Joint Units IQFR-CSIC-BIFI and GBsC-CSIC-BIFI

Universidad de Zaragoza, Zaragoza (Spain)

Aragon Institute for Health Research, Zaragoza (Spain)

Biomedical Research Network Center in Hepatic and Digestive Diseases (CIBERehd), Madrid (Spain)

ARAID Foundation, Gobierno de Aragón, Zaragoza (Spain)

<sup>d</sup> Dr. J. Munarriz

Departamento de Química Física

Instituto de Biocomputación de Sistemas Complejos (BIFI)

Universidad de Zaragoza, Zaragoza (Spain)

Current address: Departamento de Química Física y Analítica, Universidad de Oviedo, Oviedo (Spain)

<sup>e</sup> Dr. R. M. Tejedor

Centro Universitario de la Defensa

Academia General Militar, Zaragoza (Spain).

**Table S1** Crystallographic data for p-BIB, {p-BIB·DTMABr} (1), {p-BIB·TPABr} (2) and {p-BIB·TBABr} (3).

| Compound                        | p-BIB                                         | 1                                                  | 2                                                  | 3                                                  |
|---------------------------------|-----------------------------------------------|----------------------------------------------------|----------------------------------------------------|----------------------------------------------------|
| Empirical formula               | C <sub>10</sub> H <sub>4</sub> I <sub>2</sub> | C <sub>23</sub> H <sub>34</sub> BrI <sub>2</sub> N | C <sub>22</sub> H <sub>32</sub> BrI <sub>2</sub> N | C <sub>26</sub> H <sub>40</sub> BrI <sub>2</sub> N |
| Formula weight                  | 377.93                                        | 658.22                                             | 644.20                                             | 700.30                                             |
| Crystal System                  | Monoclinic                                    | Monoclinic                                         | Monoclinic                                         | Monoclinic                                         |
| a, Å                            | 4.1533(3)                                     | 7.8843(4)                                          | 9.9332(4)                                          | 17.9505(8)                                         |
| b, Å                            | 17.1541(16)                                   | 14.5796(6)                                         | 8.8016(4)                                          | 8.6914(4)                                          |
| c, Å                            | 7.0511(5)                                     | 11.5600(4)                                         | 14.5701(7)                                         | 18.8483(7)                                         |
| α, deg                          |                                               |                                                    |                                                    |                                                    |
| β, deg                          | 95.332(7)                                     | 97.065(3)                                          | 98.374(4)                                          | 90.616(4)                                          |
| γ, deg                          |                                               |                                                    |                                                    |                                                    |
| V, Å <sup>3</sup>               | 500.19(7)                                     | 1318.73(10)                                        | 1260.25(10)                                        | 2940.4(2)                                          |
| T, K                            | 150(2)                                        | 150(2)                                             | 150(2)                                             | 150(2)                                             |
| Space group                     | P2 <sub>1</sub> /n                            | P2 <sub>1</sub> /m                                 | P2/n                                               | P2/c                                               |
| Z                               | 2                                             | 2                                                  | 2                                                  | 4                                                  |
| μ(Mo Kα), mm <sup>-1</sup>      | 6.229                                         | 3.908                                              | 4.087                                              | 3.510                                              |
| θ range, deg                    | 3.14 to 24.71                                 | 2.95 to 26.37                                      | 2.71 to 25.68                                      | 2.81 to 24.71                                      |
| Refl. collected                 | 1610                                          | 5627                                               | 6307                                               | 42018                                              |
| Uniq reflect / R <sub>int</sub> | 848 / 0.0464                                  | 2803 / 0.0410                                      | 2394 / 0.0769                                      | 5007 / 0.0403                                      |
| R1/wR2 (I>2σ)                   | 0.0434 / 0.0650                               | 0.0480 / 0.0937                                    | 0.0431 / 0.0628                                    | 0.0553 / 0.1564                                    |
| R1/wR2 (all data)               | 0.0693 / 0.0756                               | 0.0712 / 0.1070                                    | 0.0943 / 0.0692                                    | 0.0785 / 0.1699                                    |
| Max. shift/esd                  | 0.003                                         | 0.007                                              | 0.004                                              | 0.005                                              |
| Residual ρ/e Å <sup>-3</sup>    | 0.846 and -0.840                              | 1.134 and -0.893                                   | 1.033 and -0.600                                   | 1.212 and -1.475                                   |

**Table S2** Uncorrected and corrected interaction energies of the optimized trimers, (IBrI)-180, (IBrI)-139 (IBrI)-75, using B3LYP-D3 and 6-311G+(d,p)/DGDZVP or B3LYP-D3 and def2TZVP.

| Complex    | 6-311g+(d,p)/DGDZVP  |                          | def2TZVP             |                          |
|------------|----------------------|--------------------------|----------------------|--------------------------|
|            | $\Delta E$           | $\Delta E_{\text{BSSE}}$ | $\Delta E$           | $\Delta E_{\text{BSSE}}$ |
|            | $\text{kJ mol}^{-1}$ | $\text{kJ mol}^{-1}$     | $\text{kJ mol}^{-1}$ | $\text{kJ mol}^{-1}$     |
| (IBrI)-180 | -38.7                | -36.6                    | -40.3                | -38.0                    |
| (IBrI)-139 | -39.5                | -37.4                    | -41.2                | -38.9                    |
| (IBrI)-75  | -39.2                | -37.3                    | -41.1                | -39.1                    |

**Table S3** Performance of different methodologies for the {p-BIB·DTMABr} (1) crystal structure.

| {p-BIB·DTMABr} | a     | b      | c      | $\Delta a$ | $\Delta b$ | $\Delta c$ |
|----------------|-------|--------|--------|------------|------------|------------|
| Method         | Å     | Å      | Å      | %          | %          | %          |
| Experimental   | 7.884 | 14.580 | 11.560 | --         | --         | --         |
| revPBE-D3BJ    | 8.056 | 14.517 | 11.742 | 2.17       | -0.43      | 1.57       |
| SCAN           | 7.890 | 14.404 | 11.571 | 0.08       | -1.21      | 0.10       |
| SCAN-D3        | 7.754 | 14.035 | 11.294 | -1.66      | -3.73      | -2.30      |
| SCAN-D3BJ      | 7.732 | 13.975 | 11.256 | -1.93      | -4.14      | -2.63      |

**Table S4** Performance of different methodologies for the {p-BIB·TPABr} (2) crystal structure.

| {p-BIB·TPABr} | a      | b     | c      | $\Delta a$ | $\Delta b$ | $\Delta c$ |
|---------------|--------|-------|--------|------------|------------|------------|
| Method        | Å      | Å     | Å      | %          | %          | %          |
| Experimental  | 9.933  | 8.802 | 14.570 | --         | --         | --         |
| revPBE-D3BJ   | 10.042 | 8.645 | 14.691 | 1.09       | -1.78      | 0.83       |
| SCAN          | 9.914  | 8.632 | 14.578 | -0.20      | -1.92      | 0.05       |
| SCAN-D3       | 9.842  | 8.424 | 14.231 | -0.92      | -4.29      | -2.33      |
| SCAN-D3BJ     | 9.824  | 8.373 | 14.234 | -1.10      | -4.87      | -2.30      |

**Table S5** Interactions energies and distance of the I···Br<sup>-</sup> contact of optimized [p-BIB·Br]<sup>-</sup> and similar dimers extracted from optimized trimer (B3LYP-D3 and 6-311G+(d,p)/DGDZVP).

| Complex                      | $\Delta E$           | $d(\text{I}\cdots\text{Br}^-)$ |
|------------------------------|----------------------|--------------------------------|
|                              | $\text{kJ mol}^{-1}$ | Å                              |
| [p-BIB:Br] <sup>-</sup>      | -103.3               | 3.030                          |
| [p-BIB:Br] <sup>-</sup> -180 | -100.3               | 3.168                          |
| [p-BIB:Br] <sup>-</sup> 139  | -100.5               | 3.159                          |
| [p-BIB:Br] <sup>-</sup> 75   | -98.6                | 3.229                          |

**Table S6** Uncorrected and corrected interaction energies ( $\Delta E$  and  $\Delta E_{\text{BSSE}}$ , respectively) of the dimers (single point calculations) using B3LYP-D3BJ/6-311G+(d,p)/DGDZVP or B3LYP-D3BJ/6-311G++(d,p)/DGDZVP.

| Complex                 | 6-311G+(d,p)/DGDZVP |                          | 6-311G++(d,p)/DGDZVP |                          |
|-------------------------|---------------------|--------------------------|----------------------|--------------------------|
|                         | $\Delta E$          | $\Delta E_{\text{BSSE}}$ | $\Delta E$           | $\Delta E_{\text{BSSE}}$ |
|                         | $\text{kJ/mol}$     | $\text{kJ/mol}$          | $\text{kJ/mol}$      | $\text{kJ/mol}$          |
| trans type I I···I in 1 | -5.6                | -4.9                     | -5.6                 | -4.9                     |
| 1-a                     | -21.9               | -18.8                    | -21.9                | -18.8                    |
| 2-a                     | -12.0               | -11.3                    | -12.0                | -11.3                    |
| 2-b                     | -13.8               | -11.5                    | -13.8                | -11.5                    |
| 3-a                     | -13.9               | -11.6                    | -13.9                | -11.6                    |
| 3-b                     | -7.2                | -4.3                     | -7.2                 | -4.3                     |

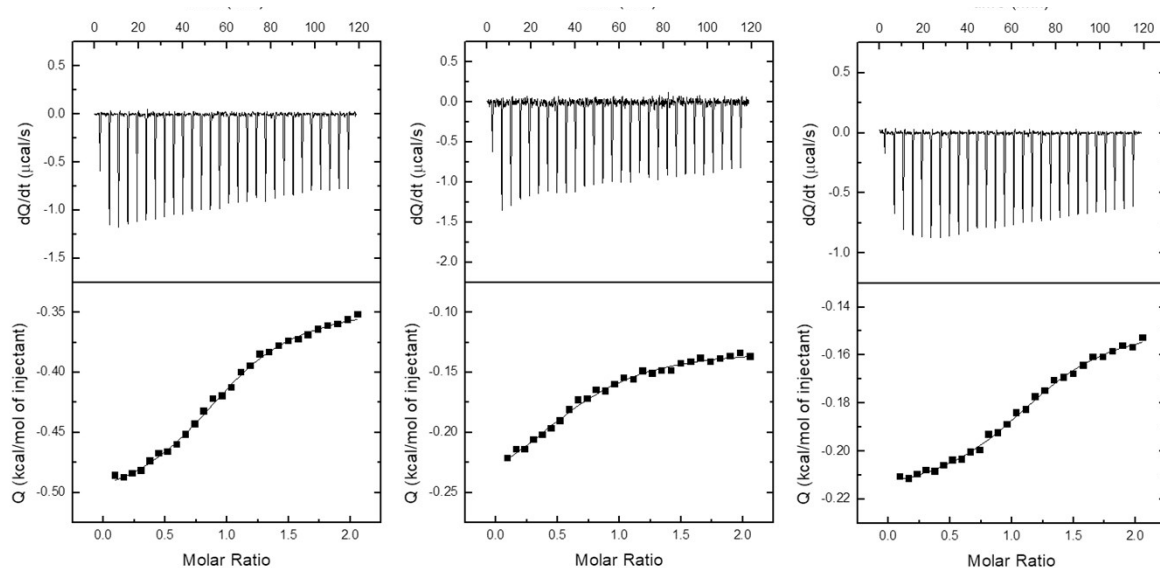

**Figure S1** Calorimetric titrations of *p*-BIB with bromide salts: (left) TBABr, (center) TPABr, and (right) DTMABr. The upper panels show the thermograms (thermal power as a function of time) and the lower panels report the interaction isotherm (heat evolved associated with each injection, normalized per mole of titrant injected, as a function of the molar ratio). Continuous lines represent the fitting to a 1:1 binding model.

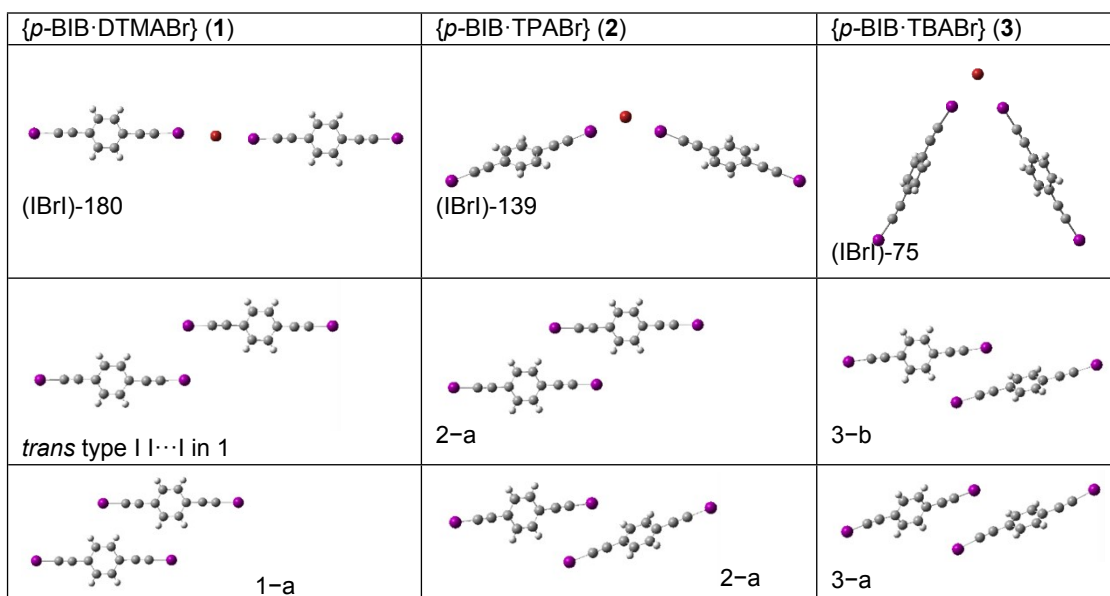

**Figure S2** Dimers and trimers extracted of the crystal structures 1, 2 and 3.

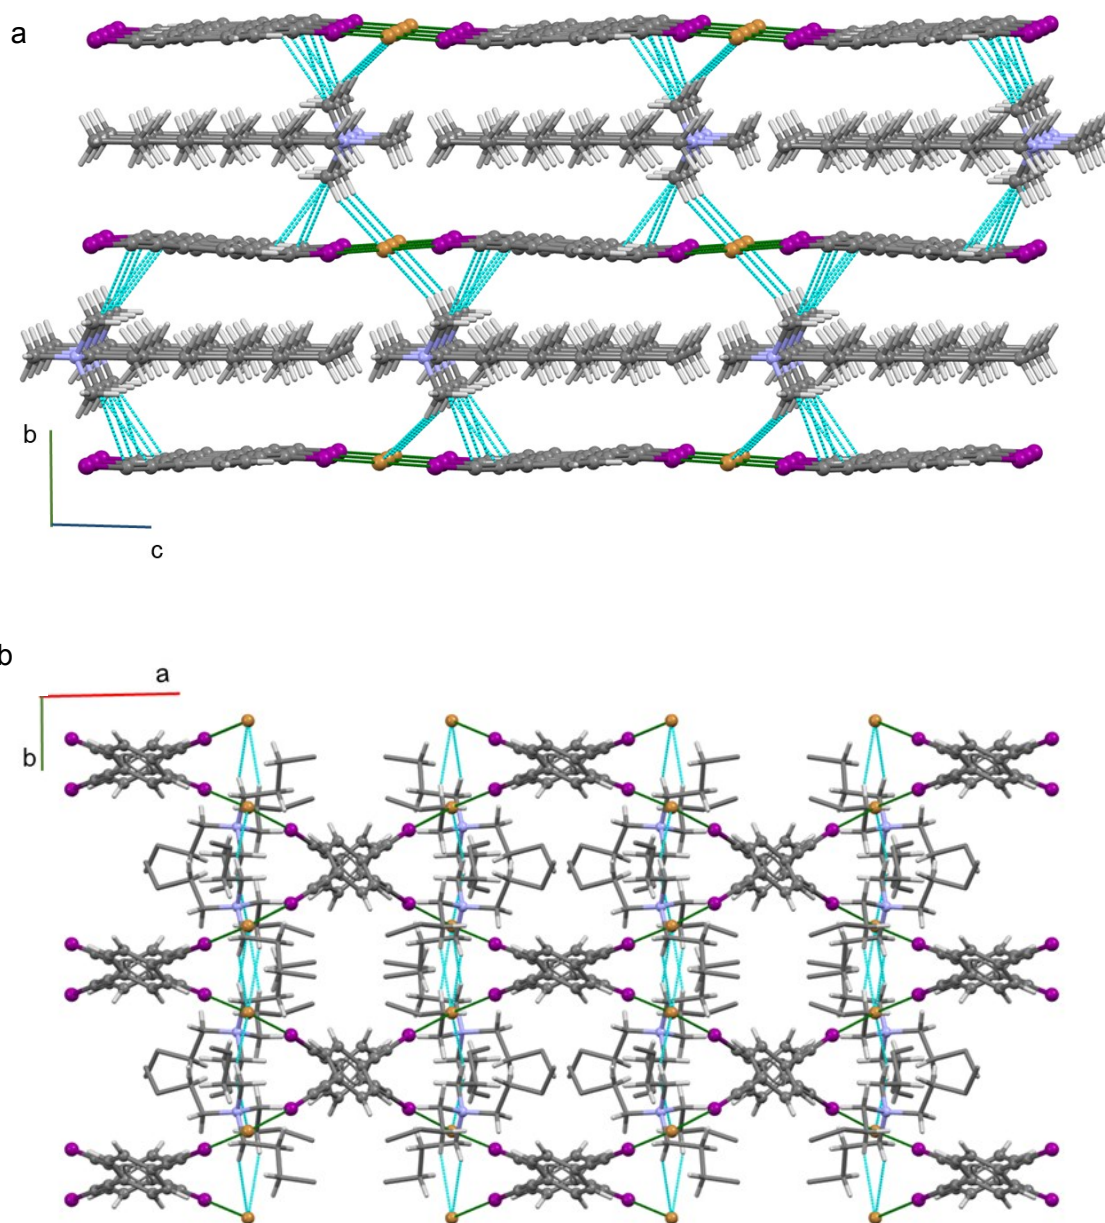

**Figure S3** (a) Projection view of **1** along *a* axis showing the layered nature of anionic and cationic networks and (b) projection view of **3** along *c* axis. The dashed green line denotes the halogen bond and the dashed blue line denotes the hydrogen bond.

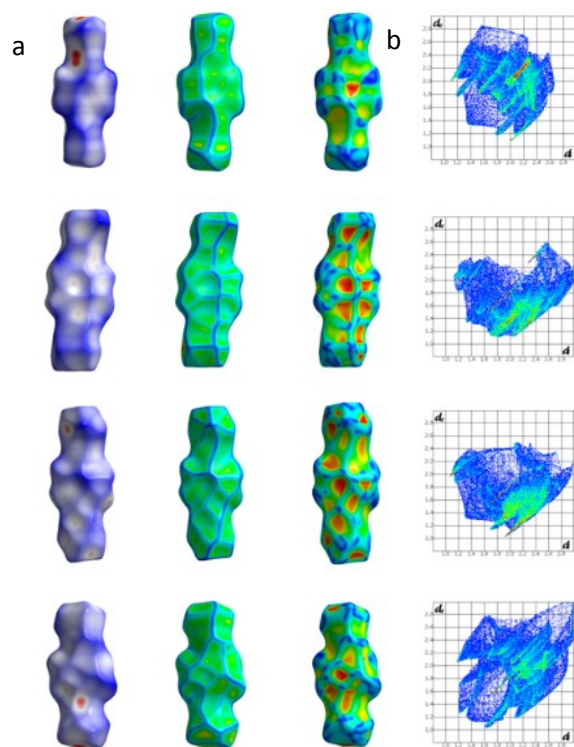

**Figure S4** Hirshfeld surfaces (a) and 2D fingerprint plots (b) for the *p*-BIB molecules in *p*-BIB and **1** to **3** crystal structures. For each structure the Hirshfeld surface is shown mapped with  $d_{\text{norm}}$  (left), curvedness (center) and shape index (right).

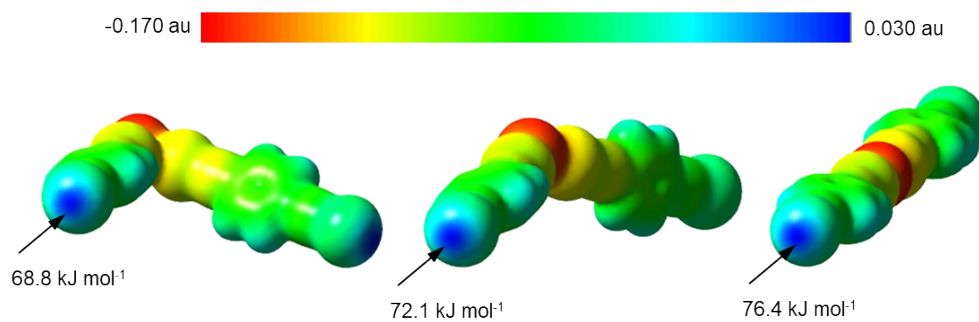

**Figure S5** Computed electrostatic potential of the optimized geometry of (IBrI)-75 (left), (IBrI)-139 (middle) and (IBrI)-180 (right). Potentials are mapped on the respective electron density isosurfaces ( $0.002 \text{ e/Bohr}^3$ ).

Calculated gas-phase energy of complexes optimized with B3LYP-D3/6-311G+ (d,p)-DGDZVP and Cartesian coordinates of calculated structures.

(IBrI)-180; Energy ( $E_{\text{au}}$ ), -31020.01562 Hartrees

|    |              |             |             |
|----|--------------|-------------|-------------|
| I  | 3.16806600   | 0.00565200  | -0.01561900 |
| C  | 5.23277400   | 0.00930100  | -0.02581800 |
| C  | 6.45081600   | 0.01219200  | -0.03066600 |
| C  | 7.87102900   | 0.01595300  | -0.03602400 |
| C  | 8.60287600   | 0.07030000  | 1.17096200  |
| H  | 8.06151300   | 0.10916700  | 2.10522100  |
| C  | 9.99051100   | 0.07450200  | 1.16649800  |
| H  | 10.53611800  | 0.11679500  | 2.09893400  |
| I  | 15.35675200  | 0.03391200  | -0.06198200 |
| C  | 13.34417700  | 0.03003700  | -0.05577200 |
| C  | 12.13146300  | 0.02860800  | -0.05210700 |
| C  | 10.70739000  | 0.02436600  | -0.04667300 |
| C  | 9.98168200   | -0.03012100 | -1.25441900 |
| H  | 10.52059900  | -0.06903100 | -2.19087600 |
| C  | 8.59406700   | -0.03421900 | -1.24847500 |
| H  | 8.04599500   | -0.07632200 | -2.17868100 |
| Br | 0.00000000   | 0.00000000  | 0.00000000  |
| I  | -15.35675200 | -0.03391200 | 0.06198200  |
| C  | -13.34417700 | -0.03003700 | 0.05577200  |
| C  | -12.13146300 | -0.02860800 | 0.05210700  |
| C  | -10.70739000 | -0.02436600 | 0.04667300  |
| C  | -9.98168200  | 0.03012100  | 1.25441900  |
| H  | -10.52059900 | 0.06903100  | 2.19087600  |
| C  | -8.59406700  | 0.03421900  | 1.24847500  |
| H  | -8.04599500  | 0.07632200  | 2.17868100  |
| I  | -3.16806600  | -0.00565200 | 0.01561900  |
| C  | -5.23277400  | -0.00930100 | 0.02581800  |
| C  | -6.45081600  | -0.01219200 | 0.03066600  |
| C  | -7.87102900  | -0.01595300 | 0.03602400  |
| C  | -8.60287600  | -0.07030000 | -1.17096200 |
| H  | -8.06151300  | -0.10916700 | -2.10522100 |
| C  | -9.99051100  | -0.07450200 | -1.16649800 |
| H  | -10.53611800 | -0.11679500 | -2.09893400 |

(IBrI)-139; Energy ( $E_{\text{au}}$ ), -31020.01683 Hartrees

|    |              |             |             |
|----|--------------|-------------|-------------|
| I  | -2.95835700  | 1.59581200  | 0.00617600  |
| C  | -4.92002000  | 0.93725800  | 0.00870300  |
| C  | -6.07757600  | 0.55755100  | 0.00908600  |
| C  | -7.42951800  | 0.12246100  | 0.00668200  |
| C  | -7.91028800  | -0.76942900 | 0.99086400  |
| H  | -7.22773500  | -1.12095800 | 1.75105000  |
| C  | -8.33502300  | 0.57190900  | -0.98010100 |
| H  | -7.97955000  | 1.25389800  | -1.73896200 |
| I  | -14.57131400 | -2.11962900 | 0.00501600  |
| C  | -12.64837300 | -1.52726100 | 0.00391200  |
| C  | -11.49083800 | -1.16553100 | 0.00391100  |
| C  | -10.13264100 | -0.73734900 | 0.00368200  |
| C  | -9.65744100  | 0.15177900  | -0.98218300 |
| H  | -10.33817500 | 0.50546700  | -1.74397900 |
| C  | -9.23260900  | -1.19045800 | 0.99003200  |
| H  | -9.58530900  | -1.87271400 | 1.75093300  |
| Br | 0.00000600   | 2.70247600  | 0.00007000  |
| I  | 2.95834900   | 1.59575800  | -0.00618900 |
| C  | 4.91997500   | 0.93709600  | -0.00880300 |
| C  | 6.07751500   | 0.55734000  | -0.00921800 |
| C  | 7.42947800   | 0.12231300  | -0.00677100 |
| C  | 7.91035700   | -0.76943300 | -0.99103100 |
| H  | 7.22787400   | -1.12089700 | -1.75131000 |
| C  | 8.33489400   | 0.57168300  | 0.98012800  |
| H  | 7.97933700   | 1.25356400  | 1.73904700  |
| I  | 14.57134100  | -2.11956500 | -0.00499400 |
| C  | 12.64839500  | -1.52721100 | -0.00388000 |
| C  | 11.49085700  | -1.16549100 | -0.00387500 |

|   |             |             |             |
|---|-------------|-------------|-------------|
| C | 10.13264000 | -0.73737400 | -0.00368900 |
| C | 9.65733000  | 0.15161200  | 0.98225200  |
| H | 10.33799500 | 0.50524000  | 1.74413800  |
| C | 9.23269800  | -1.19040100 | -0.99015800 |
| H | 9.58548300  | -1.87254600 | -1.75112000 |

(IBrI)-75; Energy ( $E_{\text{au}}$ ), -31020.01652 Hartrees

|    |             |             |             |
|----|-------------|-------------|-------------|
| Br | -0.01764000 | -6.80835200 | 0.00581300  |
| I  | -1.98701400 | -4.25045900 | 0.00138500  |
| C  | -3.20027100 | -2.58115500 | -0.00241600 |
| C  | -3.91098100 | -1.59207900 | -0.00535600 |
| C  | -4.73457600 | -0.43517400 | -0.00970000 |
| C  | -4.26601100 | 0.78840100  | -0.53772700 |
| H  | -3.26429900 | 0.83064700  | -0.94022800 |
| C  | -6.04578700 | -0.47303700 | 0.51423500  |
| H  | -6.41564400 | -1.40296800 | 0.92149700  |
| I  | -9.06448500 | 5.67032700  | -0.03039000 |
| C  | -7.90433400 | 4.02653300  | -0.02534400 |
| C  | -7.20282100 | 3.03727800  | -0.02178300 |
| C  | -6.37797100 | 1.87637800  | -0.01782500 |
| C  | -6.85047700 | 0.65748700  | 0.51058000  |
| H  | -7.85199200 | 0.61238100  | 0.91534900  |
| C  | -5.06967300 | 1.91962300  | -0.54211100 |
| H  | -4.69620300 | 2.84877200  | -0.94951100 |
| I  | 9.10332500  | 5.61759800  | 0.02788500  |
| C  | 7.93289900  | 3.98109000  | 0.02375900  |
| C  | 7.22411700  | 2.99702400  | 0.02028200  |
| C  | 6.39034100  | 1.84254900  | 0.01600500  |
| C  | 6.54955200  | 0.84137700  | -0.96406300 |
| H  | 7.31652400  | 0.95897800  | -1.71695200 |
| C  | 5.73548900  | -0.28237700 | -0.96854700 |
| H  | 5.86409500  | -1.04455300 | -1.72350000 |
| I  | 1.95683800  | -4.25373900 | 0.00070200  |
| C  | 3.17741800  | -2.58980400 | -0.00023800 |
| C  | 3.89439200  | -1.60519900 | 0.00117600  |
| C  | 4.72708800  | -0.45492900 | 0.00548500  |
| C  | 4.57161100  | 0.55115300  | 0.98485800  |
| H  | 3.80288500  | 0.43175300  | 1.73458000  |
| C  | 5.38501400  | 1.67532700  | 0.99058100  |
| H  | 5.25266200  | 2.43697600  | 1.74635200  |

[ $p$ -BIBr] $^-$ ; Energy ( $E_{\text{au}}$ ), -16796.90333 Hartrees

|    |             |             |             |
|----|-------------|-------------|-------------|
| Br | 7.60580600  | -0.00002300 | 0.00000500  |
| I  | 4.57614900  | -0.00002200 | -0.00004500 |
| C  | 2.46327400  | 0.00000100  | -0.00012800 |
| C  | 1.24158800  | 0.00001700  | -0.00017900 |
| C  | -0.17676500 | 0.00005100  | -0.00012200 |
| C  | -0.90796800 | 1.21056000  | -0.00008300 |
| H  | -0.36282800 | 2.14346900  | -0.00010100 |
| C  | -0.90802700 | -1.21042100 | -0.00008900 |
| H  | -0.36293400 | -2.14335800 | -0.00011000 |
| I  | -7.66759400 | -0.00005800 | 0.00010700  |
| C  | -5.65476400 | 0.00008500  | 0.00008800  |
| C  | -4.44158200 | 0.00016000  | 0.00005000  |
| C  | -3.01796400 | 0.00012200  | -0.00000900 |
| C  | -2.29526800 | -1.21128800 | -0.00003400 |
| H  | -2.83743400 | -2.14697400 | -0.00001200 |
| C  | -2.29520900 | 1.21149600  | -0.00002900 |
| H  | -2.83732800 | 2.14720900  | -0.00000300 |
